# Supplementary material for: Solvothermal synthesis of group 5 and 6 nitrides via reactions using LiNH2 and ammonia nitrogen sources
Source: Royal Society of Chemistry journal article supplement (doi:10.1039/c0dt00120a), 2010-01-01
Supplement: c0dt00120a.pdf [file c0dt00120a.pdf]

**Supplementary data – further TEM images of samples discussed in DT-ART-03-2010-000120, “Solvothetmal synthesis of group 5 and 6 nitrides via reactions using  $\text{LiNH}_2$  and ammonia nitrogen sources”, P. Chirico, A. L. Hector and B. Mazumder**

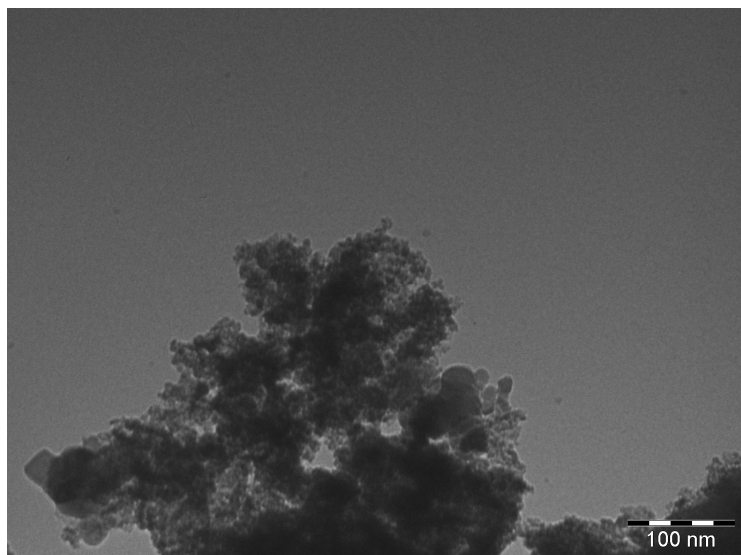

**Fig. S1** Product of  $\text{VCl}_3$  plus  $\text{LiNH}_2$  at 550 °C

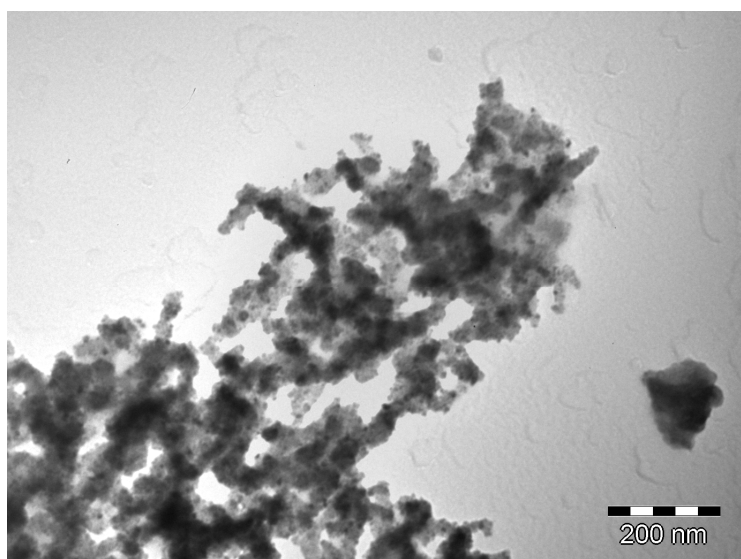

**Fig. S2** Product of  $\text{NbCl}_5$  plus  $\text{LiNH}_2$  at 550 °C

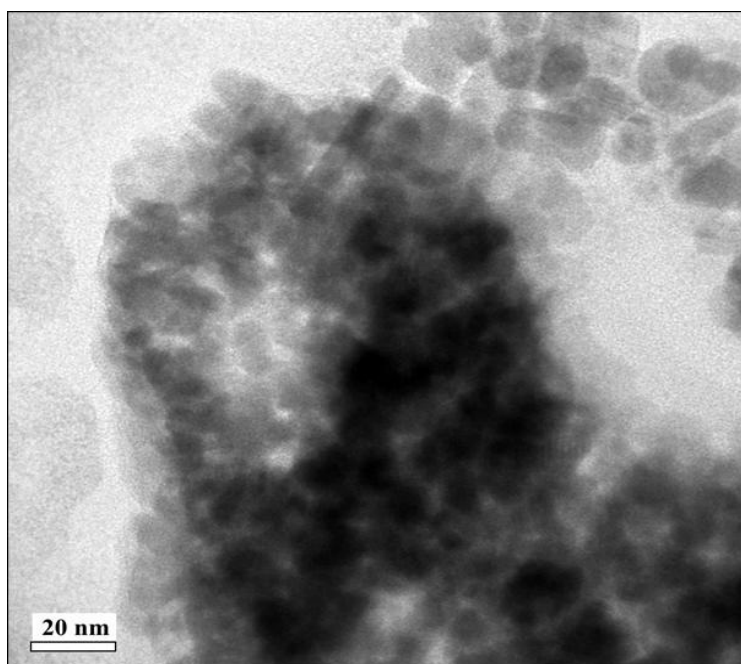

**Fig. S3** Product of  $\text{Ta}_3\text{N}_5$  plus  $\text{LiNH}_2$  at 550 °C

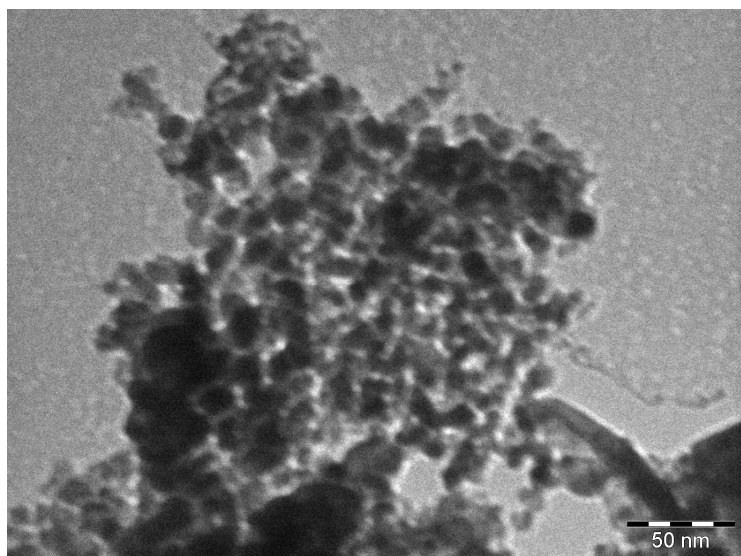

**Fig. S4** Product of  $\text{CrCl}_3$  plus  $\text{LiNH}_2$  at 550 °C

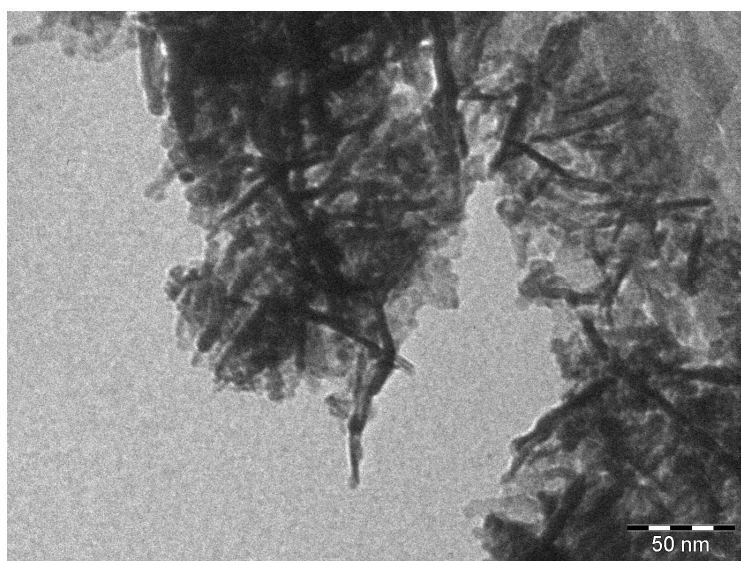

**Fig. S5** Product of  $\text{MoCl}_5$  plus  $\text{LiNH}_2$  at 550 °C

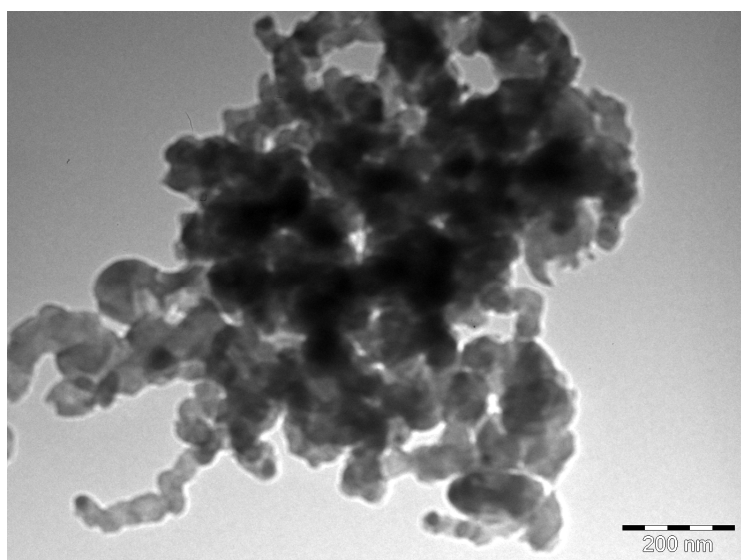

**Fig. S6** Product of  $\text{WCl}_4$  plus  $\text{LiNH}_2$  at 550 °C

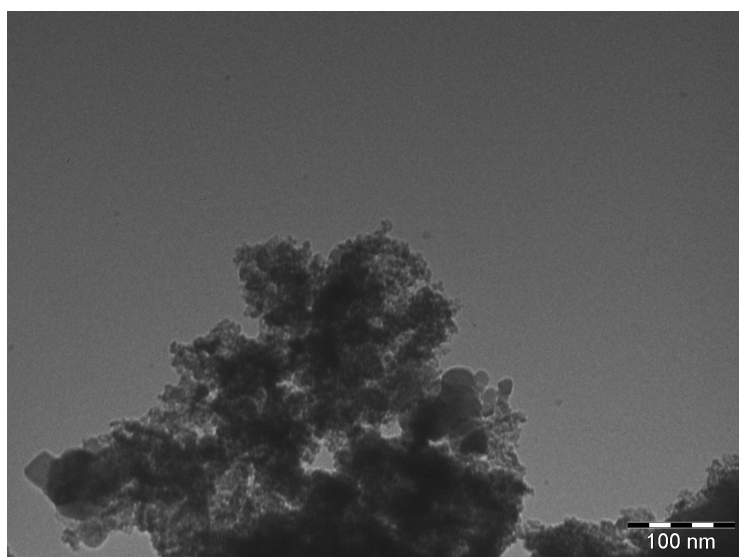

**Fig. S7** Product of  $\text{VCl}_3$  and  $\text{NH}_3$  at 500 °C

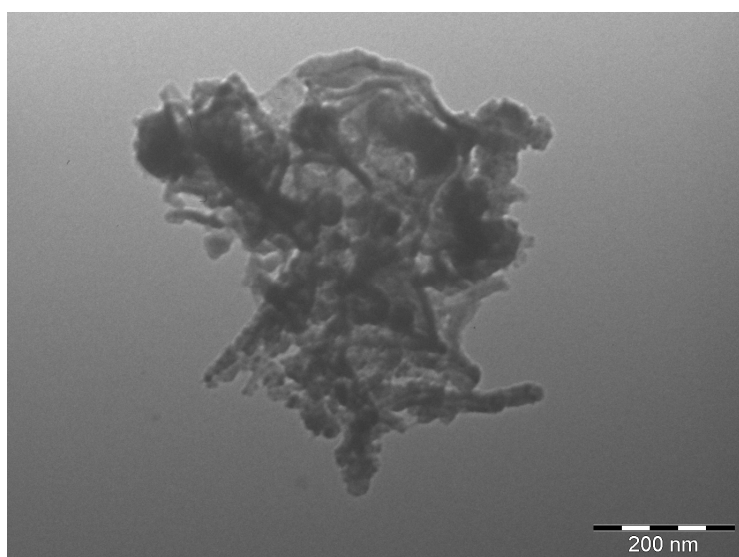

**Fig. S8** Product of  $\text{NbCl}_5$  and  $\text{NH}_3$  at 550 °C

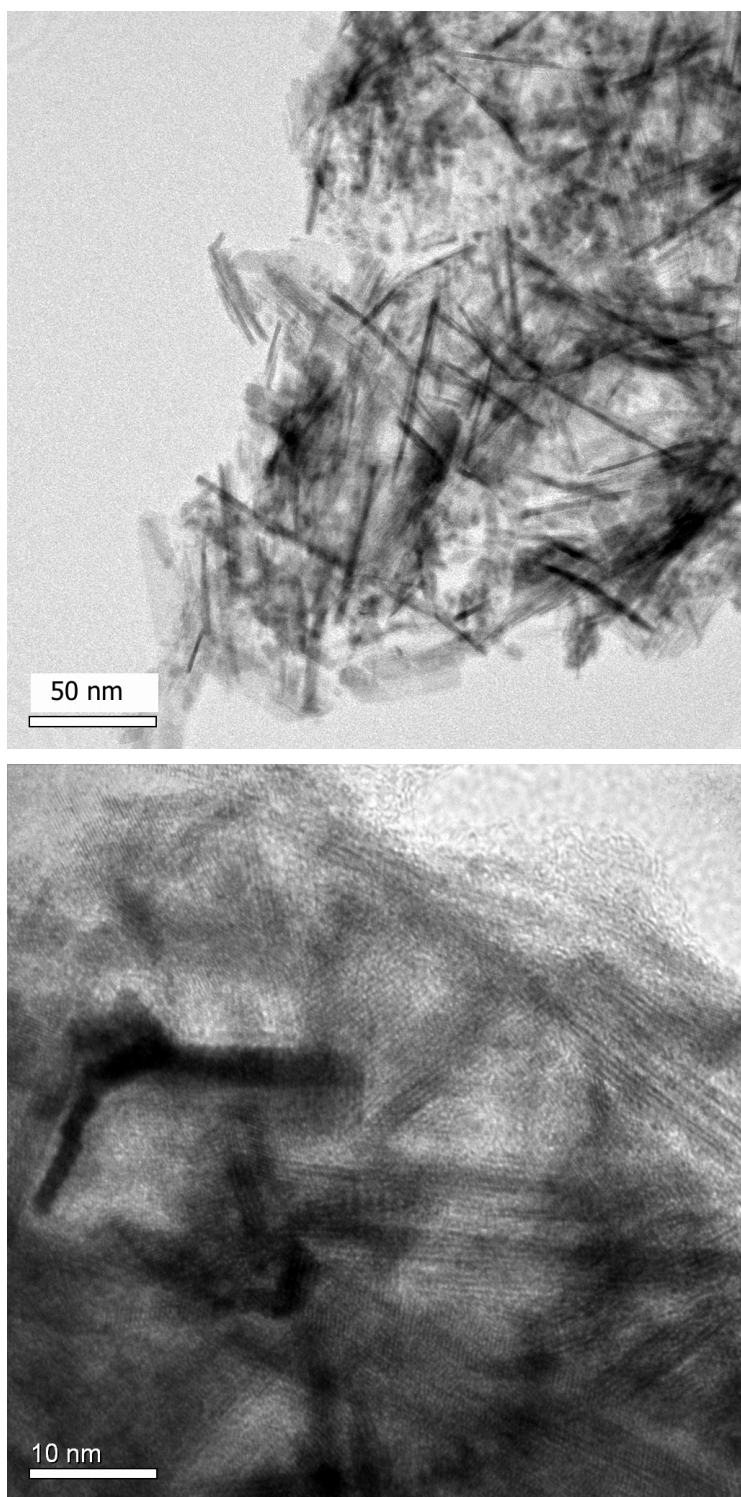

**Fig. S9** Product of TaCl<sub>5</sub> and NH<sub>3</sub> at 550 °C

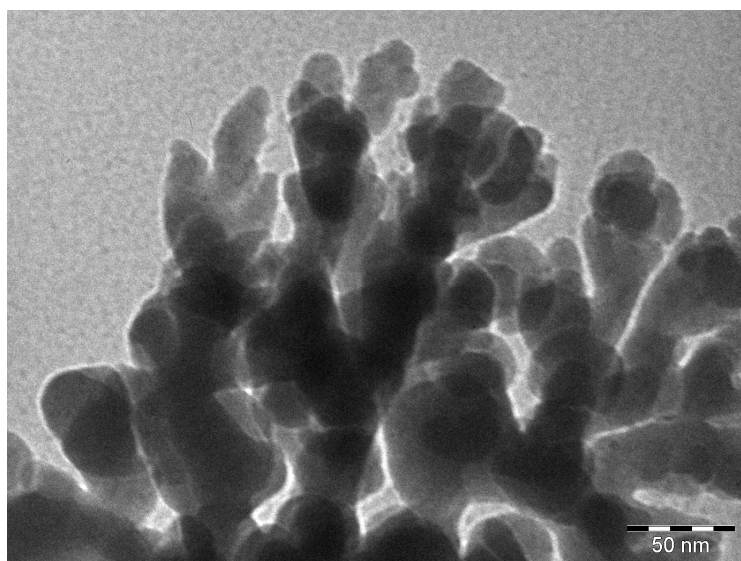

**Fig. S10** Product of  $\text{CrCl}_3$  and  $\text{NH}_3$  at 550 °C

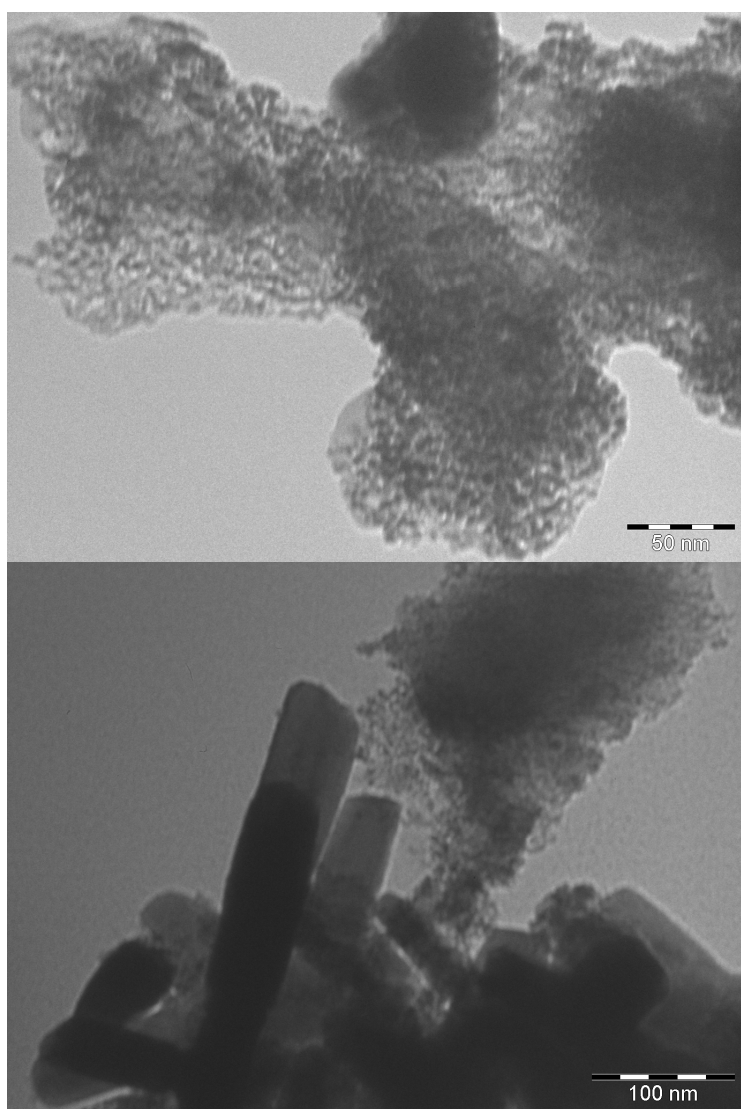

**Fig. S11** Product of  $\text{MoCl}_5$  and  $\text{NH}_3$  at 550 °C

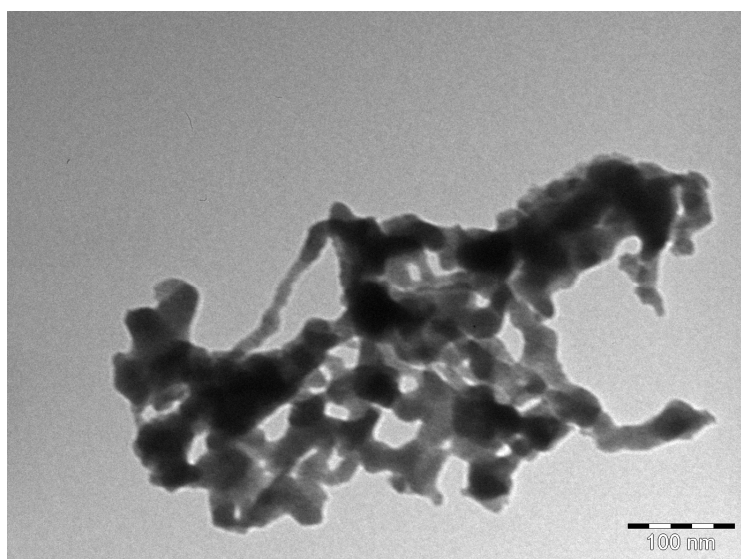

**Fig. S12** Product of  $\text{WCl}_4$  and  $\text{NH}_3$  at 550 °C
